# Supplementary material
Source: Springer Nature journal article supplement (https://www.springermedizin.de/resource/supplementary/12936_2007_488_MOESM4_ESM.pdf/9547806)
Supplement: MOESM4 [file 9547806]

## FcGR2A (G/A) R131H rs1801274

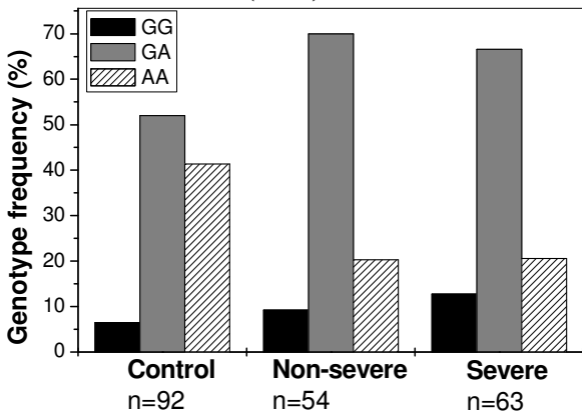

### OR for GG and AA:

Severe vs. control (OR= 3.9, 95% CI: 0.98-16.02, P=0.026)

Nonsevere vs. control (OR=2.88, 95% CI: 0.57-13.7, P=0.12)

Severe vs. non-severe (OR=1.35, 95% CI: 0.28-6.88, P=0.67)

### OR for GA and AA:

Severe vs. control (OR= 2.56, 95% CI: 1.13-5.84, P=0.013)

Nonsevere vs. control (OR=2.73, 95% CI: 1.16-6.56, P=0.01)

Severe vs. non-severe (OR=0.94, 95% CI: 0.34-2.56, P=0.88)

### OR for allele frequency (G and A):

Severe vs. control (OR= 1.73, 95% CI: 0.94-3.2, P=0.06)

Nonsevere vs. control (OR=1.6, 95% CI: 0.66-2.95, P=0.11)

All severe vs. nonsevere (OR=1.08, 95% CI: 0.6-1.97, P=0.77)
